# Supplementary material
Source: publisher site journal article supplement (https://www.dovepress.com/article/282738)
Supplement: Supplementary file 1 [file get_supplementary_file.php]

**Supplementary Table 1.** COMPOSE-1,-2, and -3 Institutional Review Boards.

| **COMPOSE-1** | **COMPOSE-2** | **COMPOSE-3** |
| --- | --- | --- |
| Ethikkommission der  Medizinischen Universität Wien  Borschkegasse 8b, E06  Wien, Wien 1090  Austria | Ethikkommission der Stadt Wien  Thomas-Klestil-Platz 8  Vienna Vienna 1030  Austria | Bellberry HREC  129 Glen Osmond Road  Eastwood, SA 5063  Australia |
| CEC/LEC: Etická komise pro  multicentrická hodnocení Krajská  nemocnice Liberec, a.s.  Husova 10  Liberec 460 63  Czech Republic | CEC/LEC: Etická komise Krajská  nemocnice Liberec, a.s.  Husova 10  Liberec 460 63  Czech Republic | Hunter New England Research  Ethics Committee  Research Ethics and Governance  Unit, District Headquarters  Administration Building, Lookout  Road  New Lambton, NSW 2305 Australia |
| Ethikkommission der Bayerischen  Landesärztekammer  Mühlbasurstr 16  München, Bayern 81677 Germany | Ethikkommission der  Landesärztekammer  Im Semmicht 33  Jena  Thuringen 07751 Germany | Royal Adelaide Hospital Research  Ethics Committee  Royal Adelaide Hospital  North Terrace  Adelaide SA 5000 Australia |
| Komisja Bioetyczna przy  Bydgoskiej Izbie Lekarskiej  ul. Powstańców Warszawy 11 Bydgoszcz 85-681 Poland | Komisja Bioetyczna przy  Beskidzkiej Izbie Lekarskiej w  Bielsku-Bialej  ul. Krasinskiego 28  Bielsko-Biala 43-300  Poland | Commissie Medische Ethiek van  Universitaire Ziekenhuizen  KULeuven – Campus  Gasthuisberg  Herestraat 49  Leuven 3000  Belgium |
| CEIC Hospital General  Universitario de Alicante  Centro de Diagnósticos  3a Planta (Edificio Gris)  C/ Pintor Baeza, 12  Alicante, Alicante 3010 Spain | CEIC Hospital Clinic de Barcelona  c/ Villarroel. 170  Barcelona, Barcelona 08036  Spain | Den Videnskabsetiske Komite for  Region Syddanmark  Regionshuset  Damhaven 12  Vejle 7100  Denmark |
| NRES Committee East Midlands  Nottingham 2  The Old Chapel  Royal Standard Place  Nottingham NG1 6FS United Kingdom | Schulman Associates Institutional  Review Board  4445 Lake Forest Drive Suite 300  Cincinnati, OH 45242 United States | Tallinn Medical Research Ethics  Committee  Hiiu str. 42  Tallinn  Harjumaa 11619  Estonia |
| Reading Health System  Institutional Review Board  Sixth Avenue and Spruce Street  N-Building, Ground Floor  West Reading, PA 19611 United States |  | CPP TOURS – Region Centre –  Ouest 1  Hopital Bretonneau – CHRU  TOURS – Batiment B1A  2, Boulevard Tonnelle  TOURS Cedax 9 37044  France |
| Schulman Associates Institutional  Review Board  4445 Lake Forest Drive Suite 300  Cincinnati, OH 45242 United States |  | Ethikkommission der  Landesarztekammer Thuringen  Im Semmicht 33  Jena  Thuringen 07751  Germany |
|  |  | Egeszsegugyi Tudomanyos  Tanacs Klinikai Farmakologiai  Etkai Bizottsaga  Arany Janos u. 6-8  Budapest H-1051  Nagy  Hungary |
|  |  | Komisja Bioetyczna przy Slaskiej  Izbie Lekarskiej w  Katowicach  ul. Grazynskiego 49a  Katowice 40-126  Poland |
|  |  | University of the Witwatersrand,  Human Research Ethics  Committee  8 Blackwood Avenue  Parktown  Johannesburg  Gauteng 2193  South Africa |
|  |  | CEIC – Consorci Sanitari Integral  Hospital General De l-Hospitalet  AV Joseph Molins, 29-41  L’Hospitalet de Llobregat  Barcelona 08906  Spain |
|  |  | CEIC Hospital Universitari de  Girona Doctor Josep Trueta  Avinguda de Franca s/n  Girona 17007  Spain |
|  |  | Regionala Etikprovningsnamnden  i Stockholm  Karolinska Institutet/Solna  Nobels vag 9, plan D3  Stockholm 171  Sweden |
|  |  | NRES Committee North West –  Liverpool East  North West Centre of Research  Ethics Committees  3rd Floor, Barlow House, 4  Minshull Street  Manchester M1-3DZ  United Kingdom |
|  |  | Schulman Associates Institutional  Review Board  4445 Lake Forest Drive Suite 300  Cincinnati, OH 45242 United States |

### **Supplementary Table 2.** Conversion of Opioid Analgesics Dose to Morphine Equivalents.

Morphine equivalent dose = (Dose of opioid analgesics) × (Conversion factor)

| Opioid | Unit | Conversion Factor |
| --- | --- | --- |
| Levomethadone | mg | 8 |
| Levorphanol | mg | 7.5 |
| Hydromorphone | mg | 4 |
| Methadone | mg | 4 |
| Oxymorphone | mg | 3 |
| Fentanyl (topical or transdermal) | ug/hour | 2.4 |
| Oxycodone | mg | 1.5 |
| Hydrocodone | mg | 1 |
| Morphine | mg | 1 |
| Codeine | mg | 0.15 |
| Dihydrocodeine | mg | 0.15 |
| Fentanyl (intravenous, sublingual, or transmucosal) | ug | 0.1 |
| Meperidine | mg | 0.1 |
| Butorphanol | mg | 0 |
| Pentazocine | mg | 0 |
| Tapentadol | mg | 0 |
| Tramadol | mg | 0 |
| Buprenorphine | mg | 0 |
| Sufentanil | mg | 0 |

**Supplementary Table 3.** Treatment-Emergent Adverse Events Occurring in ≥5% of Patients

| **Adverse event** | **COMPOSE-1 and -2 (integrated)** | | **COMPOSE-3** | |
| --- | --- | --- | --- | --- |
| **Naldemedine**  **(n=542)** | **Placebo**  **(n=546)** | **Naldemedine**  **(n=621)** | **Placebo**  **(n=619)** |
| Diarrhea | 42 (7.7) | 13 (2.4) | 68 (11.0) | 33 (5.3) |
| Abdominal pain | 31 (5.7) | 8 (1.5) | 51 (8.2) | 19 (3.1) |
| Nausea | 26 (4.8) | 16 (2.9) | 49 (7.9) | 35 (5.7) |
| Urinary tract infection | 13 (2.4) | 22 (4.0) | 38 (6.1) | 51 (8.2) |
| Vomiting | 8 (1.5) | 6 (1.1) | 37 (6.0) | 19 (3.1) |
| Upper respiratory tract infection | 13 (2.4) | 12 (2.2) | 36 (5.8) | 33 (5.3) |
| Back pain | 16 (3.0) | 15 (2.7) | 36 (5.8) | 31 (5.0) |
| Headache | 12 (2.2) | 6 (1.1) | 29 (4.7) | 33 (5.3) |
